# Supplementary material for: Engineering a multicellular vascular niche to model hematopoietic cell trafficking
Source: PubMed Central journal article supplement (PMC5865379; doi:10.1186/s13287-018-0808-2), 2018-03-23
Supplement: 13287_2018_808_MOESM1_ESM.pdf [file 13287_2018_808_MOESM1_ESM.pdf]

**Table S1.** Primer information for RT-PCR analysis.

| Primers used for RT-PCR | Sequence                                       |
|-------------------------|------------------------------------------------|
| L32 – for normalization | AGTTCCTGGTCCACAACGTC<br>TTGGGGTTGGTGA CTCTGAT  |
| cMYC ex3 /hMYC Ex3      | AAGGACTATCCTGCTGCCAA<br>CGCCTCTTGACATTCTCCTC   |
| ICAM1 ex7               | GTACCTCTATAACCGCCAGC<br>GCTTGTGTGTTTCGGTTTCAT  |
| VCAM1 ex9               | ATGCCCATCTATGTCCCTTG<br>GCAGTTACTGTTCTTCAGGC   |
| MCP1 ex3                | AAACCCAAACTCCGAAGACT<br>ATAAACAGGGTGTCTGGGG    |
| TEK ex23                | AGCCAGTCCC GTTTTCATTTA<br>TGTTAGCATCCTGGACTGAC |
| VWF ex52                | ACCAATGGCTCTGTTGTGTA<br>CTCACTTGCTGCACTTCCT    |
| PECAM1 ex2              | ACAACCCAGTAGAGATGCAG<br>ATTTTCCACCATGACGCTTG   |
| KDR ex 30-1             | GCCCCATCCTCAAAGAAGTA<br>CGAACACTTACATTGCCTGG   |
| Angpt1 ex9              | TCTGCCTGTAAGTGTCCAAG<br>GGAGGCC CAGTAGCTTTATT  |
| Angpt2 Ex9              | TCTTATGAGCGAGAATGGGG<br>AAGCTCCTCTCAGCAAACT    |
| cFOS ex4                | TTCTCTGACTCGCTCAGCTC<br>AGTCCTTGAGGCCACAGC     |
| Egr1 ex2-2              | ACTCCTCTGTTCCCCCTGCT<br>GTCCTGGGAGAAAAGGTTGCT  |
| CXCR4 ex2               | GGCCAAGTTCTTAGTTGCTG<br>GATTCACTACACGCTCTGGA   |
| CXCL12 ex4              | TCTGTGAGATCCGTCTTTGG<br>AGACTTGTCTTTTGCGGGTA   |
| FLT3 ex24               | GGATTTGGGGCTACTCTCTC<br>TAGGGATAGGTGGAGGGATG   |
| FLT4 ex30               | CGGTCTGGTTCTTCCCTTTA<br>TCTCTCATGAGCTGGTTCAC   |
| IL6 ex5                 | GGCACCTCAGATTGTTGTTG<br>CATAAGTTCTGTGCCAGTG    |
| IL8 ex4                 | GTGTTGGTAGTGCTGTGTTG<br>ATTGACTGTGGAGTTTTGGC   |
| NFKB ex24               | GCAAACCTCAGCTTTACCGAG<br>GTCCTTCCTGCCATAATCA   |
| RELA ex11               | AGCCCACAAAGCCTTATCAA<br>CTGGTATCTGGGGCGTTATT   |
| DKK3 ex14               | CCCTGTCCAGATTATTGGCT<br>CATCTCCTCCCCTCAAACAA   |
| SELE ex4                | AGCAAAGGTGAAGAGACCAA<br>TGTGCCAAGATTTTACAGCG   |

SupplementaryTable 1. (Continued)

| Primers used for RT-PCR | Sequence                                     |
|-------------------------|----------------------------------------------|
| CSF2 Ex4                | TTCCTGTGCAACCCAGATTA<br>AAGGGGATGACAAGCAGAAA |
| HIF1a ex15              | TTAGCATGTAGACTGCTGGG<br>GCTGCCTTGTATAGGAGCAT |
| IL1a ex7                | CCATCACAGGTAGTGAGACC<br>ACAAGTTTGGATGGGCAAC  |
| IL1b ex7                | AGAGAGTCCTGTGCTGAATG<br>AGACAACAGGAAAGTCCAGG |
| IL3 ex5                 | CGGAGGAAACTGACGTTCTA<br>TGGACGTTGGACTCAAAGA  |
| IL1 ex4                 | GAAGGAAGCCAACCAGAGTA<br>TCAGCTCGAACACTTTGAAT |
| TGFb ex7                | ATGGGGGCTGTATTTAAGGA<br>GCAGTCCTCTCTCCATCTTT |
| TGBS1 ex22              | TCAAACCAGTGTAAGGCAGT<br>TTCCTGCTACATCTGCACAA |
| TIMP1 ex6               | CCCAGATAGCCTGAATCCTG<br>AAAGATGGGAGTGGGAACAG |
| TIMP3 ex5               | TGAGCCCAGACTTGATGTTT<br>AGGGAACTTGTGTAGGTTGG |
| CHRDL1 ex12             | TCAGCCAGATGTGTTCAAGT<br>GCCCTTTTCAGATCTCTCCA |
| KITLG ex10              | GCTTTGCACCTCTTTGGTAG<br>TCACTCAGGAGGCAACATTT |
| MIP1a ex3               | AAGCCACCAGACTGACAAAT<br>TTATTATTTCCCCAGGCCGA |
| Notch1 ex34             | TCCACCAGTTTGAATGGTCA<br>AGAGGGTTGTATTGGTTCGG |
| OCLN ex9                | ACAGCAATGGAAAACCACAC<br>CAAAGGAATGGGAAACGAC  |
| PDGFb ex7               | CGTTTTGAAGACGTGGACTC<br>ACTCCATCTCTAACCCACCT |
| ROBO4 ex18              | TGCCAAACAAAGGGTTCAAG<br>TGACAACAGTACGAGGATGG |
| SELP ex17               | CAGTGGTTGCTGTTGATGAG<br>CTTGATTCTTGGCCTTCTGC |
| CDH5 ex5                | GCCAATCCATGCTCTCTTTC<br>TAAAGGCCACATCTTGGGT  |
| CSPG4 ex10              | ACCAGGGTAACCTCCTACAT<br>CCTTCTCCTTGCCCTCTTAG |
| FLT1 ex30               | TAAGGTCAAGGGAAAACCCC<br>AAACGTGACTGACTTCCTGT |
