# Supplementary material for: Engineering a multicellular vascular niche to model hematopoietic cell trafficking
Source: PubMed Central journal article supplement (PMC5865379; doi:10.1186/s13287-018-0808-2), 2018-03-23
Supplement: 13287_2018_808_MOESM2_ESM.pdf [file 13287_2018_808_MOESM2_ESM.pdf]

Figure S1.

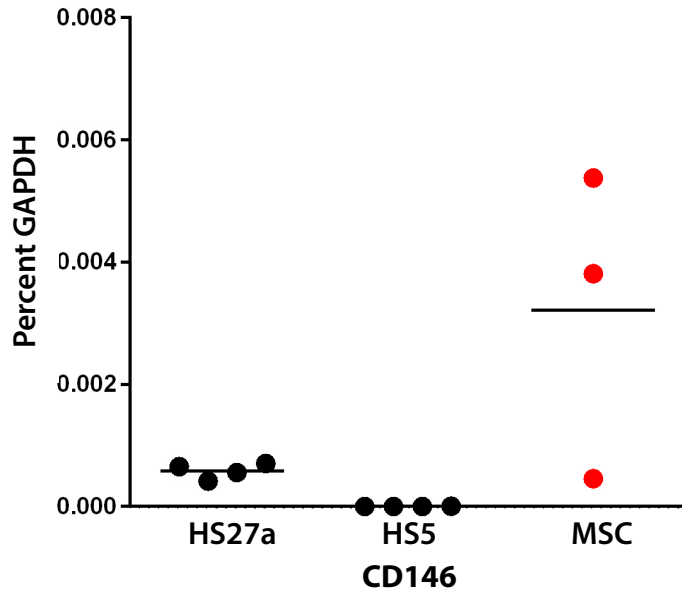

**Figure S1.** Expression of CD146 by HS27a, HS5, and MSCs is shown via RT-PCR. MSC expression of CD146 is variable compared to the HS27a and HS5 cell lines.
