# Supplementary material for: Engineering a multicellular vascular niche to model hematopoietic cell trafficking
Source: PubMed Central journal article supplement (PMC5865379; doi:10.1186/s13287-018-0808-2), 2018-03-23
Supplement: 13287_2018_808_MOESM3_ESM.pdf [file 13287_2018_808_MOESM3_ESM.pdf]

Supplementary Figure 3.

vWF Nuclei

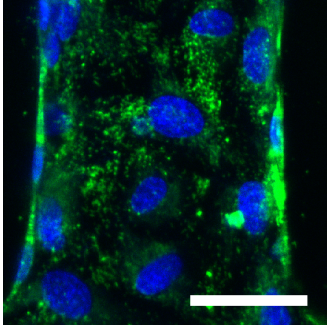

**Supplementary Figure 3.** Immunofluorescence staining of von Willebrand Factor in an EC only vessel after 6 days of culture. Scale bar = 50  $\mu$ m.
