# Supplementary material for: Engineering a multicellular vascular niche to model hematopoietic cell trafficking
Source: PubMed Central journal article supplement (PMC5865379; doi:10.1186/s13287-018-0808-2), 2018-03-23
Supplement: 13287_2018_808_MOESM5_ESM.pdf [file 13287_2018_808_MOESM5_ESM.pdf]

Figure S4.

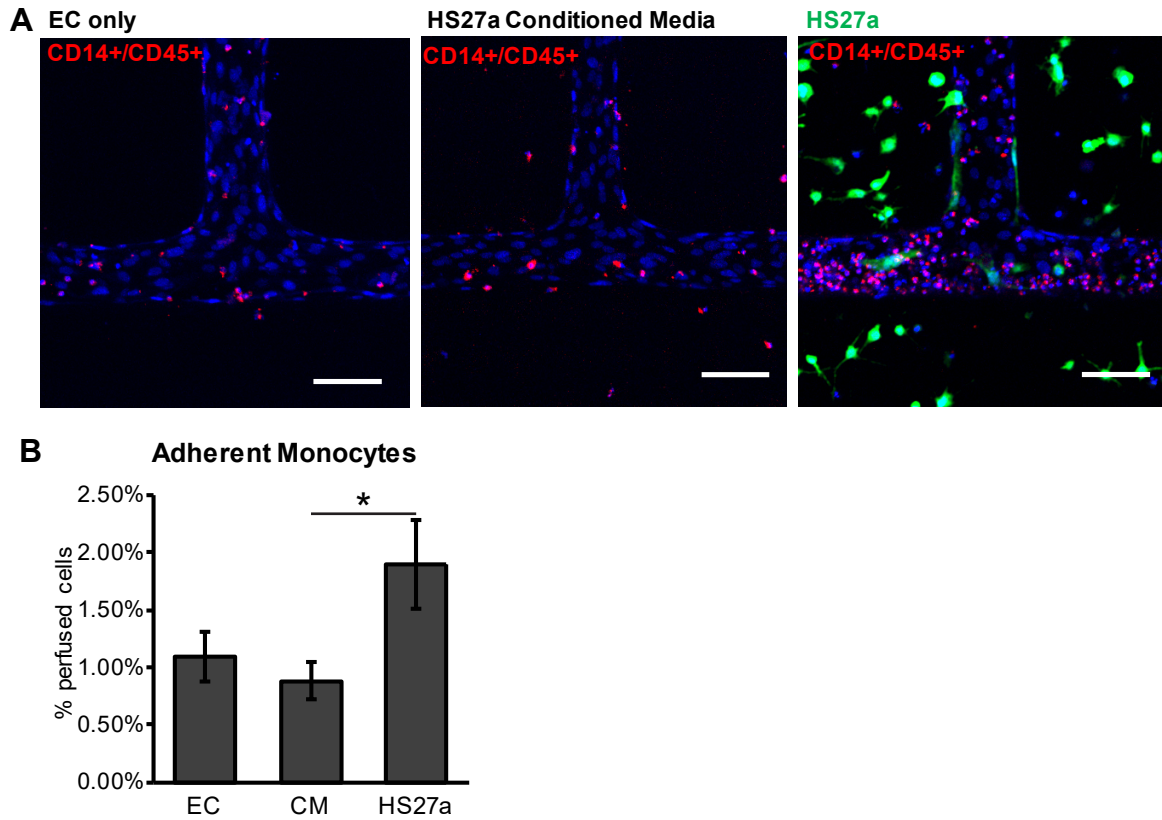

**Figure S4. Monocyte adhesion in HS27a vessels.** (A) Monocytes perfused through EC, EC with HS27a-conditioned media, or HS27a-co-cultured vessels. (B) Quantification of monocyte adhesion shows no changes in adhesion between EC only and EC with HS27a-conditioned media but an increase within the HS27a-co-cultured vessels. Scale bars = 100  $\mu$ m.
