# Supplementary material for: Engineering a multicellular vascular niche to model hematopoietic cell trafficking
Source: PubMed Central journal article supplement (PMC5865379; doi:10.1186/s13287-018-0808-2), 2018-03-23
Supplement: 13287_2018_808_MOESM6_ESM.pdf [file 13287_2018_808_MOESM6_ESM.pdf]

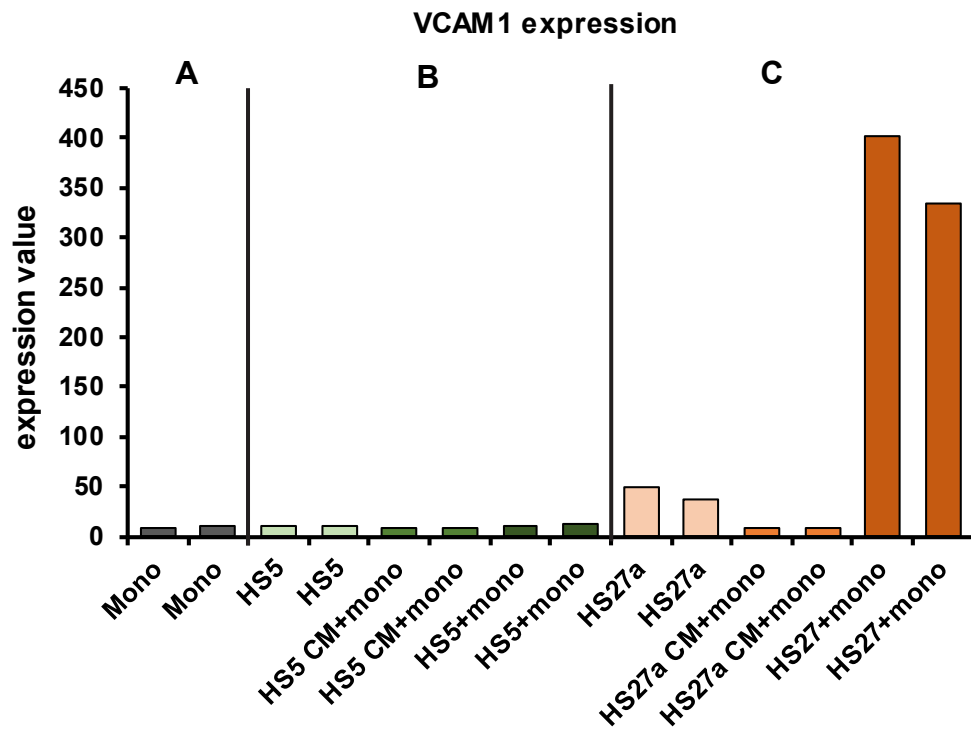

**Supplementary Figure 5. Expression of VCAM1 in monocytes co-cultured with stromal fibroblasts and conditioned media.** Microarray expression analysis of (A) monocytes from two different donors alone. (B) Expression of VCAM in HS5 cells, Monocytes cultured with HS5 conditioned media, and Monocytes co-cultured with HS5 cells. (C) Expression of VCAM in HS27a cells, Monocytes cultured with HS27a conditioned media, and Monocytes co-cultured with HS27a cells. Expression values extracted from microarray data from Iwata et al. [44] (<http://www.ncbi.nlm.nih.gov/geo/>; accession numbers GSE9390 and GSE10595, gene ID: 203868\_s\_at)
